# Supplementary material
Source: PubMed Central journal article supplement (PMC2600430)
Supplement: NIHMS3199-supplement-suppmat.pdf [file NIHMS3199-supplement-suppmat.pdf]

Type of file: table

Label: Table 1

Filename: Table 1.doc

Supplemental Table 1:

Effects of priming prior to recognition point, with the latter determined on a trial-by-trial basis. Results of an F-test corresponding to any difference between congruently and incongruently primed conditions across just the four degradation levels prior to recognition. Effects are reported at  $p < .001$ , uncorrected, inside the mask defined by the F-test for any difference between congruently and incongruently primed as derived from our first analysis (see Table 1 and Figure 2) that had not considered individual recognition times across trials (at  $p < .001$ ). Foci surviving correction for the mask volume ( $p < .05$ ) are indicated by \*.

LPF – lateral prefrontal cortex, IPL – inferior parietal lobule, SPL – superior parietal lobule, IPS – intraparietal sulcus

| region                | MNI coords |     |    | z      |
|-----------------------|------------|-----|----|--------|
| Right IPL and SPL     | 60         | -42 | 42 | 4.85 * |
|                       | 57         | -51 | 39 | 4.32   |
|                       | 60         | -54 | 27 | 3.98   |
| Left IPL              | -51        | -51 | 39 | 3.85   |
|                       | -57        | -60 | 30 | 3.77   |
| Left parietocentral   | -60        | -27 | 42 | 4.60 * |
| Right superior LPF    | 42         | 39  | 24 | 4.43 * |
|                       | 45         | 24  | 39 | 4.01   |
| Medial prefrontal     | 3          | 54  | 21 | 4.12   |
|                       | 9          | 54  | 33 | 3.94   |
|                       | 0          | 51  | 30 | 3.94   |
| Ant. (para) cingulate | 3          | 39  | 42 | 3.66   |
|                       | -6         | 42  | 33 | 3.66   |

---

|               |    |     |    |      |
|---------------|----|-----|----|------|
| Retrosplenial | 0  | -39 | 27 | 3.81 |
|               | -6 | -48 | 33 | 3.75 |
|               | 6  | -48 | 33 | 3.60 |

---

Type of file: table

Label: Table 2

Filename: Table 2.doc

Supplemental Table 2:

Activity up to and including point of recognition, on a trial-by-trial basis, averaged across congruently and incongruently primed conditions: Results of an F-test corresponding to any change in activity over the 5 time bins, having covaried out effects of degradation level. Results are reported masked inclusively by the F-test for any difference between congruently and incongruently primed objects across the 10 degradation levels (at  $p < .001$ , uncorrected) as determined by our first analysis (Table 1). \*\* significant at  $p < .05$ , corrected for the whole brain, \* significant at  $p < .05$ , corrected for the mask volume.

LPF – lateral prefrontal cortex, SPL – superior parietal lobule, IPS – intraparietal sulcus

| region               | MNI coords |     |     | Z      |
|----------------------|------------|-----|-----|--------|
| Ant. (para)cingulate | 3          | 18  | 51  | >8**   |
| Right inferior LPF   | 36         | 24  | -3  | >8**   |
| Right sup LPF        | 48         | 12  | 30  | 5.95*  |
|                      | 54         | 12  | 39  | 5.77*  |
| Left inferior LPF    | -33        | 21  | -6  | >8**   |
| Right fusiform       | 33         | -54 | -18 | 7.33** |
|                      | 42         | -63 | -15 | 7.24** |
| Left fusiform        | -36        | -60 | -18 | 6.49** |
|                      | -42        | -63 | -12 | 6.24** |
|                      | -30        | -48 | -21 | 5.13** |
| Right IPS            | 39         | -45 | 51  | 5.76** |
|                      | 63         | -24 | 42  | 5.50** |
|                      | 48         | -66 | 36  | 4.48*  |

---

|                   |     |     |     |        |
|-------------------|-----|-----|-----|--------|
| Left IPS          | -51 | -30 | 45  | 6.71** |
|                   | -42 | -45 | 60  | 6.04** |
|                   | -45 | -69 | 33  | 5.32*  |
| Medial prefrontal | 3   | 60  | 0   | 5.42** |
|                   | 0   | 60  | 21  | 4.47*  |
| R thalamus        | 9   | -9  | 9   | 5.40** |
| L middle temporal | -66 | -24 | -12 | 5.21** |
| R sup occipital   | 33  | -78 | 21  | 5.01** |
| L sup occipital   | -36 | -90 | 15  | 4.69*  |
| R sup temporal    | 60  | -3  | 3   | 4.52*  |
| R sup frontal     | 18  | 51  | 42  | 4.48*  |
| Retrosplenial     | 0   | -63 | 36  | 4.36*  |

---
